# Supplementary material
Source: ML conference proceedings conference paper supplement (https://openaccess.thecvf.com/content/CVPR2023/html/Pang_DPE_Disentanglement_of_CVPR_2023_paper.html)
Supplement: Supplementary file 1 [file Pang_DPE_Disentanglement_of_CVPR_2023_supplemental.pdf]

# DPE: Disentanglement of Pose and Expression for General Video Portrait Editing

## Supplemental Material

Anonymous CVPR submission

Paper ID 7268

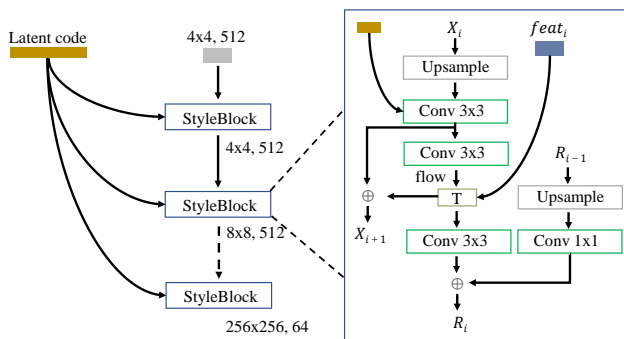

Figure 1. Pose and expression generators, which are based on StyleGAN2 [1].  $T$  is the warping transformation.  $R$  means RGB images. And  $X$  indicates the output of each StyleBlock.

## A. Additional Network Details

### A.1. Motion Editing Module.

Our motion editing module consists of an encoder and several multiple perceptron (MLP) layers. The encoder consists of a convolution layer followed by seven residual blocks with resolutions from 256 to 4. And the outputs of the first five residual blocks are viewed as part of  $\mathcal{F}$  described in Sec. 3. At the end of encoder, an additional convolution layer is used to project the feature maps to a latent space that is supposed to be decomposable into two orthogonal subspaces. Based on the latent code, several MLP layers are used to disentangle the latent space of the encoder to two orthogonal subspaces. Specifically, the architecture of the disentanglement module is that the first five MLP layers act as the shared backbone, followed by two heads that each consists of three MLP layers to decouple the expression and pose motion code, respectively.

### A.2. Pose and Expression Generators.

The two generators share the same architecture but different parameters. As shown in Fig. 1, based on StyleGAN2 [1], we exploit the latent code to generate multiscale flow fields

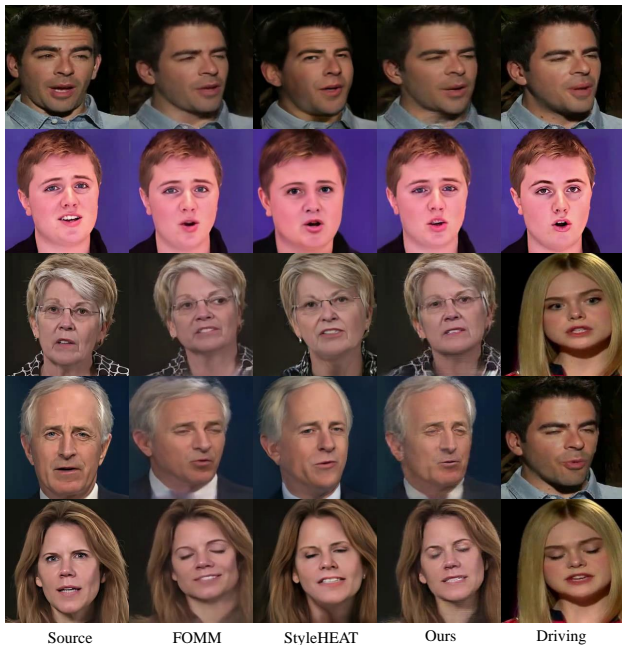

Figure 2. Comparisons with FOMM [3] and StyleHEAT [4] on one-shot talking face generation.

that are used to warp the feature maps from the encoder in the motion editing module. Specifically, StyleBlock from StyleGANs is borrowed to implement the whole process. There are two outputs in StyleBlock, one is the warped feature maps  $X_{i+1}$ , and the other is the RGB image  $R_i$  with the current resolution. The inputs include  $R_{i-1}$  and  $X_i$  from the previous layer as well as latent code and feature maps from motion editing module. Each StyleBlock is used to upsample  $\times 2$  the previous resolution. We stack 6 blocks towards producing 256 resolution images.

## B. Additional Experiment Details.

In *video.mp4*, we compare with state-of-the-art methods on one-shot talking face generation and video portrait editing.

## B.1. One-shot Talking Face Generation.

Due to space limitations in the main paper, we show the qualitative comparisons for FOMM [3] and StyleHEAT [4]. According to Fig. 2, our method preserves the identity better than other two methods. It can be observed that FOMM and StyleHEAT tend to change the face shape of the source image if the face shape of the driving image differs from the source. Especially for cross-identity reenactment, the face shape of FOMM is far away from the source face. And FOMM produces twisted faces especially when the head pose difference is large between the source and driving faces. Moreover, our method has better control over the details of expression. For same-identity reenactment, StyleHEAT is inaccurate about the handling of the eyes. For instance, as shown in the first row, the eye gaze is abnormal. Also, in the forth row, StyleHEAT is not accurate for opening and closing of the eyes.

## B.2. Disentanglement for Video Portrait Editing.

For video demo, we download videos of real movies and news scenes from YouTube. Since the appropriate talking clips cannot be kept for a long time in movie scene when they are used as the source videos, we repeat them for a sufficient length of time to show the effect better. As shown in *video.mp4*, we demonstrate the qualitative comparisons for PIRender [2] and StyleHEAT [4] by exchanging their 3DMM parameters for expression editing only. For StyleHEAT, as the input face needs to be aligned, it cannot be directly pasted back to the original image. So the whole face is shaking a lot. For both PIRender and our method, faces move freely within a fixed bounding box and no need to align, so the results are better than StyleHEAT. However, PIRender does not maintain the shape and identity of the source face well, as well as the transfer of the expression. According to the red arrow of the videos, it can be seen that there is an obvious double-face phenomenon at the paste edge in PIRender. In addition, there is also an obvious incongruity between the inner and outer faces of PIRender. For instance, the inner face generated by PIRender is always swaying back and forth, but the hair and background are stable. In contrast, our results are more stable and have better edge details. In addition, PIRender is not accurate for the transfer of expression, especially for the eyes and mouths. The reason is that the extracted 3DMM parameters by a pre-trained network cannot accurately reflect the status of eyes and mouth due to the limited number of Blendshapes. Our method has yielded the best results.

In Fig. 3, we demonstrate the qualitative comparisons for PIRender [2] and StyleHEAT [4]. It can be observed that PIRender and StyleHEAT tend to change the face shape of the source image if the face shape of the driving image differs from the source. And our method achieves better accuracy in expression transfer than the other two methods, especially

the eyes and the mouth shape.

## References

- [1] Tero Karras, Samuli Laine, Miika Aittala, Janne Hellsten, Jaakko Lehtinen, and Timo Aila. Analyzing and improving the image quality of stylegan. In *CVPR*, pages 8110–8119, 2020. 1
- [2] Yurui Ren, Ge Li, Yuanqi Chen, Thomas H Li, and Shan Liu. Pirender: Controllable portrait image generation via semantic neural rendering. In *ICCV*, pages 13759–13768, 2021. 2, 3
- [3] Aliaksandr Siarohin, Stéphane Lathuilière, Sergey Tulyakov, Elisa Ricci, and Nicu Sebe. First order motion model for image animation. In *NeurIPS*, December 2019. 1, 2
- [4] Fei Yin, Yong Zhang, Xiaodong Cun, Mingdeng Cao, Yanbo Fan, Xuan Wang, Qingyan Bai, Baoyuan Wu, Jue Wang, and Yujie Yang. Styleheat: One-shot high-resolution editable talking face generation via pre-trained stylegan. *arxiv:2203.04036*, 2022. 1, 2, 3

162  
163  
164  
165  
166  
167  
168  
169  
170  
171  
172  
173  
174  
175  
176  
177  
178  
179  
180  
181  
182  
183  
184  
185  
186  
187  
188  
189  
190  
191  
192  
193  
194  
195  
196  
197  
198  
199  
200  
201  
202  
203  
204  
205  
206  
207  
208  
209  
210  
211  
212  
213  
214  
215



216  
217  
218  
219  
220  
221  
222  
223  
224  
225  
226  
227  
228  
229  
230  
231  
232  
233  
234  
235  
236  
237  
238  
239  
240  
241  
242  
243  
244  
245  
246  
247  
248  
249  
250  
251  
252  
253  
254  
255  
256  
257  
258  
259  
260  
261  
262  
263  
264  
265  
266  
267  
268  
269

270  
271  
272  
273  
274  
275  
276  
277  
278  
279  
280  
281  
282  
283  
284  
285  
286  
287  
288  
289  
290  
291  
292  
293  
294  
295  
296  
297  
298  
299  
300  
301  
302  
303  
304  
305  
306  
307  
308  
309  
310  
311  
312  
313  
314  
315  
316  
317  
318  
319  
320  
321  
322  
323

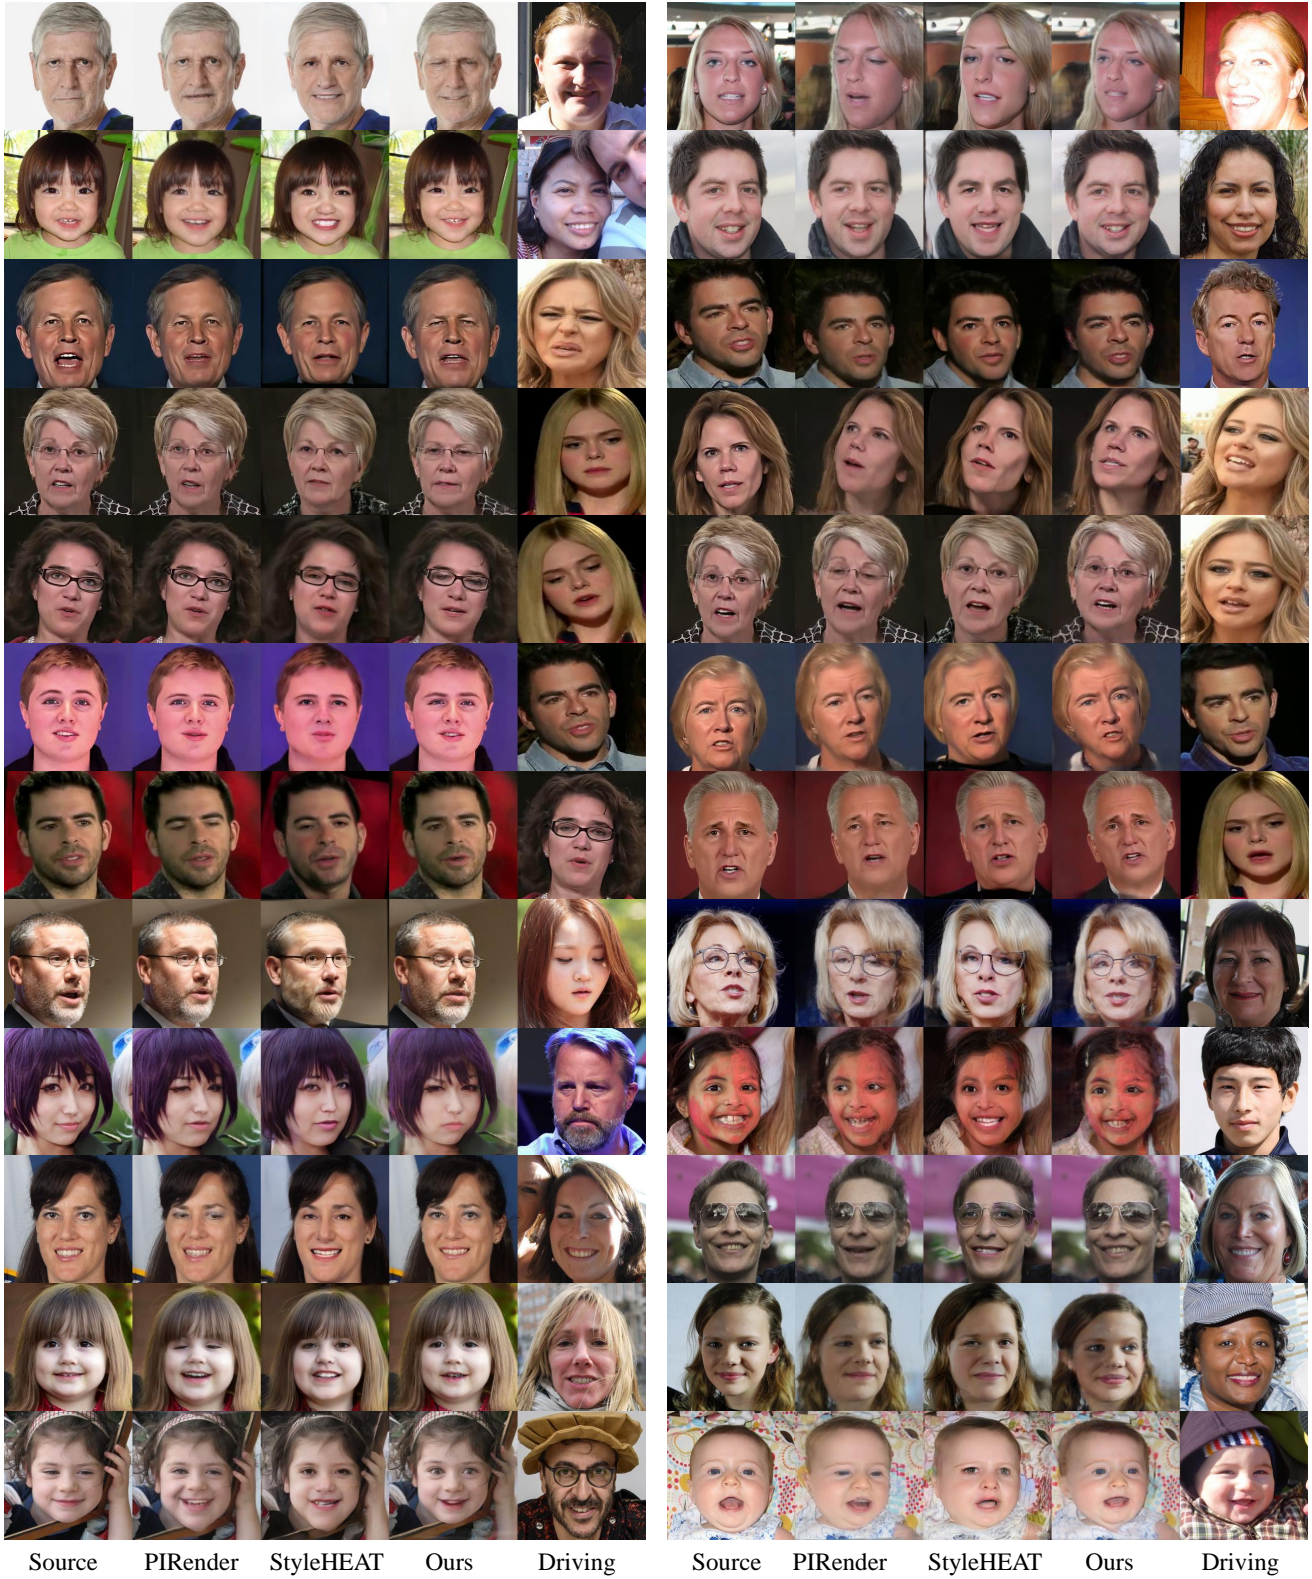

(a) Expression

(b) Pose

Figure 3. Comparisons with PIRender [2] and StyleHEAT [4] on disentanglement for video portrait editing.
